# Supplementary material
Source: Springer Nature journal article supplement (https://www.springermedizin.de/resource/supplementary/13033_2013_150_MOESM1_ESM.pdf/9651936)
Supplement: MOESM1 [file 9651936]

|                                                           | 2012 |     |     |     |     |     |     |     |     |     |     |           |
|-----------------------------------------------------------|------|-----|-----|-----|-----|-----|-----|-----|-----|-----|-----|-----------|
|                                                           | Jan  | Feb | Mar | Apr | May | Jun | Jul | Aug | Sep | Oct | Nov | Dec       |
| Guideline Development Group (GDG) appointed               |      |     |     |     |     |     |     |     |     |     |     |           |
| Identification of controversial areas                     |      |     |     |     |     |     |     |     |     |     |     |           |
| Scoping the questions and choosing outcomes               |      |     |     |     |     |     |     |     |     |     |     |           |
| Searching, synthesizing and grading the relevant evidence |      |     |     |     |     |     |     |     |     |     |     |           |
| Drafting the recommendations                              |      |     |     |     |     |     |     |     |     |     |     |           |
| Consensus and external review                             |      |     |     |     |     |     |     |     |     |     |     |           |
| Finalizing recommendations                                |      |     |     |     |     |     |     |     |     |     |     |           |
| Dissemination and implementation                          |      |     |     |     |     |     |     |     |     |     |     | ➡<br>2013 |
| GDG meetings                                              |      | X   | X   | X   | X   | X   | X   |     | X   | X   | X   | X         |
| Plenary sessions                                          |      |     |     |     |     |     |     |     | X   |     | X   |           |
